# Supplementary material for: Implementation of additional spectral wave field exchanges in a 3D wave-current coupled WAVEWATCH-III (version 6.07) – CROCO (version 1.2) configuration and assessment of their implications for macro-tidal coastal hydrodynamics
Source: Copernicus journal article supplement (doi:10.5194/egusphere-2023-715), 2023-06-26
Supplement: Supplementary file [file egusphere-2023-715-AC1-supplement.pdf]

# Reply to Reviewer 1

## General comment

*This paper presents a new coupling procedure between the 3D ocean circulation model CROCO and the spectral wave model WAVEWATCH-III, handled through the OASIS-MCT coupler, in order to improve the representation of wave-current interactions in the coastal region. More precisely, efforts are made to incorporate wave quantities derived from the full (bi-dimensional) wave spectrum that better represents “real” directionally and frequency-broad wave fields. This is in contrast with “monochromatic” approximations that use a representative wavenumber (e.g. mean or peak) as originally used and implemented in ROMS (Uchiyama et al., 2009, 2010).*

*After a broad overview of the different approaches for simulating wave-current interaction in the coastal context, the paper describes the new forcing terms. The rest of the paper focuses on a series of numerical experiments performed in the geographical setting of the Bay of Somme, France, a macrotidal site located in the English Channel. In situ data (vertical current profiles at two locations) are used to assess the model performances as well as to evaluate the added value of the newly-proposed coupling procedure.*

*I found the manuscript relatively well organised, though not particularly well written. At least, it could have used a few more readings by the authors: e.g. some internal notes made by the authors remain in the core of the manuscript (see at lines 102-107), which is not acceptable in my opinion. The efforts to incorporate full spectral representation of wave quantities are welcome, as it should help to get a better and more realistic representation of wave forces while modelling wave-current interactions with this modelling system. The (scientific) novelty is not obvious, though, since similar efforts made by other authors in ROMS are overlooked, and such spectral representation already exists in other modelling systems. So it is not clear to me whether this contribution justifies a publication or not. I have several major comments on the present work that, I think, should be addressed before a resubmission.*

We express our sincere appreciation to the Reviewer for conducting a thorough review of our manuscript and for providing valuable feedback that has greatly contributed to the enhancement of our work. We fully understand the importance of addressing the major comments raised by the Reviewer before resubmission.

In terms of the organization and clarity of the manuscript, we acknowledge the Reviewer’s valid point about the need for further editing and refinement of the text. We would like to clarify that the issue raised in lines 102-107 occurred during a minor revision phase, during which we were specifically instructed to change only the title and availability statement. Regrettably, an erroneous copy-paste during the final submission inadvertently included internal notes from another manuscript. We deeply regret this oversight. However, we want to assure the Reviewer that, apart from this isolated issue, the manuscript underwent multiple reviews and revisions by the authors prior to the initial submission to ensure its quality and coherence.

We concur with the Reviewer that certain relevant prior work was initially overlooked. Building upon the Reviewer's citations, we will incorporate references to pertinent previous studies and emphasize the specific contributions of our study in light of these works, particularly in terms of our utilization of full spectral representation of wave quantities. We also recognize the importance of highlighting the unique aspects of our work. To achieve this, we will revise the introduction to better underscore the novelty and distinctiveness of our study within the broader context of wave-current interaction modeling. This will encompass a discussion of how our approach differs from previous efforts, both within our modeling system and in other modeling systems. We firmly believe that our study provides valuable insights and advancements in the field of wave-current interaction modeling, and we are committed to conveying this effectively in the revised manuscript.

We are fully committed to address these comments and resubmit a revised manuscript that meets the necessary standards for publication.

### **Major comments**

1) *The manuscript completely ignores many relevant and recent works that have looked into these aspects, some within the frame of the same modelling system. Within ROMS, from which CROCO is derived, the works by L. Romero and the UCLA team are completely overlooked (in particular Romero et al., 2021; Hypolite et al., 2022). This also includes the work initiated by N. Kumar (Kumar et al., 2017; Liu et al., 2021) that has evaluated the impact of the definition used for the Stokes drift velocities on the modelling of wave-current interactions at regional scales. The present manuscript also ignores modelling systems already incorporating full spectral wave quantities such as MOHID (Delpy et al., 2014) or SCHISM, which has been used to simulate and analyse the wave-induced nearshore circulation in numerous realistic settings at both regional (Guérin et al., 2017; Lavaud et al., 2020; Pezerat et al., 2022) and local (Martins et al., 2022) scales.*

We highly appreciate the valuable comment provided by the Reviewer, which has guided us in improving the quality of our manuscript with the refinement of the referenced literature and the introduction of our model developments. In response to the Reviewer's observations, we have addressed the omission of references to previous model developments within the same modelling framework and those from other model systems. Of particular significance is the inclusion of reference to the work initiated by Kumar et al. (2017). These references have been thoughtfully incorporated into the introduction of our manuscript to provide a more comprehensive context for our research.

To effectively underscore the unique contributions of our manuscript in relation to the works mentioned by the reviewer, we provide a detailed discussion of each specific work, highlighting both connections and distinctions with our study.

#### **Works Within the Same Modelling System**

*Kumar et al. (2017) proposed a significant advancement in modelling wave-current inter-*

actions through the advocacy of spectral reconstruction for the forcing and coupling of wave-current models. This approach, rooted in the partitioning of WaveWatchIII, delivers more accurate estimates of the Stokes drift when compared to the spectral peak monochromatic approximation of *Uchiyama et al. (2010)*, which often results in underestimations. Later, *Liu et al. (2021)* confirmed the need of spectral estimates of the Stokes drift for both deep- and intermediate-water applications. Our study aligns with this methodology by employing full spectra from a regional spectral model to force our wave model and incorporating spectral estimates of the Stokes drift. Moreover, we have introduced additional spectral field exchanges to further refine the description of wave-current interactions, thereby distinguishing our novel approach.

*Romero et al. (2021)* introduced a novel ROMS WEC (Wave Effects on Currents) framework that extended the monochromatic approach of *Uchiyama et al. (2010)*. This extension encompassed spectral approximations of Stokes drift, Bernoulli head, and wave-induced vertical mixing, achieved through iterative computations and a switching mechanism between deep- and shallow-water formulations. *Hypolite et al. (2021)* used this framework to explore the impacts of the spectral approach on ocean mesoscale circulation variability, revealing relatively modest wave effects despite larger Stokes drift estimates. In consonance with their work, we have incorporated the exchange of spectral Bernoulli head in our model coupling. Additionally, our enhancements encompass novel spectral field exchanges designed to provide a more precise representation of the wave-induced bottom boundary layer. This includes the exchange of spectral bottom wave orbital velocity, which we have demonstrated to have a comparable impact on macro-tidal current profiles to that of the Stokes drift in our specific application. Notably, our study accentuates the significant influence of wave effects on macro-tidal currents, further distinguishing our research from prior investigations.

#### **Works on Different Model Systems Incorporating Full Spectral Wave Quantities**

While the references cited by the Reviewer describe developments akin to ours, all aimed at achieving a more comprehensive description of wave-current interactions, our study delves into aspects specific to the employed modelling system, setting it apart from the frameworks mentioned by the Reviewer in several key ways.

Regarding technical aspects, our coupled model uses different hydrodynamic and wave spectral models than the cited systems. These models are not integrated with each other, requiring a third model for coupling and thus introducing associated complexities and advantages. To do so, the CROCO coupled system uses the OASIS-MCT coupler, which is a set of libraries allowing for parallel exchanges and grid interpolations between different models. This framework has multiple advantages such as the possibility of choosing different grids for the different models (and eventually different nesting strategies), the possibility of choosing the coupling frequency, the exchanged variables, etc. This interface is thus particularly flexible and allows coupling CROCO with any model included in the OASIS-MCT library. Furthermore, the computational grids used by CROCO (which is not necessarily the same of the wave model) are structured rather than unstructured as the cited modelling systems.

Regarding historic aspects, ROMS was originally designed for regional oceanic applica-

tions. CROCO inherited from ROMS and recent model developments added up new capacities to link the regional, coastal and nearshore scales. Our work, in line with these recent advances, concentrates on its adaptation for intermediate-water macro-tidal conditions, distinguishing it from the cited modelling frameworks which are more nearshore-oriented.

These distinctions underscore the specific contributions and relevance of our study within the context of the CROCO modelling framework and the broader field of wave-current interactions.

*2) The present numerical setup is far from being ideal to discuss the added value of (full) spectral representation of wave quantities, for several reasons. The hydrodynamics simulated here is overly controlled by the forcing used at boundaries, both in terms of water levels, currents and waves, to the point that the reader asks himself what is the added value of using a local model. For instance, the wave results at the measurement site show no improvements over the large scale model used as forcing. Furthermore, water levels and currents are (to my understanding) forced from a 2D hydrodynamic model. Considering the importance given to the vertical shear, how can we be sure that the boundary is taken sufficiently far away from the location where measurements were obtained and vertical velocity profiles discussed? I suspect that the boundary is too close to the measurement stations in order to discuss differences of the order of 1 cm/s at the top layer of the water column.*

We sincerely appreciate the reviewer's valuable comments, which have raised important concerns regarding the numerical setup and the discussion of the numerical results to assess the added value of employing a full spectral representation of wave quantities.

In our research, we used a numerical model that incorporates wind stresses at the free surface, tidal currents and levels as well as full wave spectra at the offshore boundaries to simulate the hydrodynamics within the macro-tidal bay of Somme in the English Channel. This choice of setup was grounded in our belief that these specific forcing terms are the most pertinent factors for capturing the dynamics of the study area.

We duly acknowledge the reviewer's concern regarding the influence of wave boundary conditions on our simulation. It is indeed true that the hindcast data used to force the wave model exhibit some biases in our study area. Nevertheless, it is crucial to emphasize that the use of full spectra at the boundaries was made because is the best (and most computationally demanding) practice in modelling spectral waves, particularly when investigating complex phenomena such as spectral Stokes drift and wave-current interactions (as highlighted in Kumar et al., 2017, and Liu et al., 2021, both now cited in the revised manuscript).

Addressing the concern related to water levels and currents, we acknowledge the possibility that the proximity of the southern boundary to the measurement sites could result in an appearance of excessive control by the imposed forcing. To investigate this, we conducted an additional numerical simulation with an extended computational grid in the south and west directions, effectively placing the measurement sites further from the open boundaries. In this

new simulation, we limited the forcing to only the west and north offshore boundaries to assess the independence of the hydrodynamic model results from the relative distance between the forcing boundary and the measurement locations (refer to Figure 1).

The results of this supplementary simulation align closely with the outputs of the original simulation which solely employed tidal forcing. This congruence is evident in terms of circulation patterns (as illustrated in the tidal flood snapshot, Figure 2, which can be compared with Figure 6 of the submitted manuscript), time series of near-bottom currents (Figure 3), and discussed vertical profiles (Figure 4).

These additional results convincingly demonstrate that the boundary was situated at a sufficient distance from the measurement locations where vertical velocity profiles were examined. It is vital to emphasize also that the discrepancies observed in the modelled tidal currents between different tidal forcing setups are approximately one order of magnitude lower than those found when comparing pure tidal profiles with those influenced by wind and waves (as evident if comparing Figure 4 with Figure 13 of the submitted manuscript), particularly as we approach the free surface.

Based on these additional results, we assert with confidence that the choice of tidal forcing in our simulations does not exert undue control over the modelled hydrodynamics. This supports our validation of the macro-tidal currents influenced by wind and waves in the bay of Somme and the discussion of the substantial added value derived from the incorporation of additional spectral wave field exchanges.

*3) The discussion of wave processes, particularly in shallow water depths, is in my opinion weak throughout the paper. Discussion on depth-induced refraction (short waves in relatively deep water depth) is not supported by the numerical results, while the section dealing with wave breaking in shallow water (set-down and setup) is really weak, to say the least. Reading that wave effects are “removed” in depths less than 2 m (why is that so?), how can we then expect a wave setup to form near the shoreline? The influence of using a spectral representation is expected to be much more important in wave-dominated shallow-water environments, so we expect this study to also consider such environments where this model has already been applied (e.g. Duck N.C. in Uchiyama et al., 2010; or the Biscarosse site in Marchesiello et al., 2015).*

We concur with the Reviewer’s perspective that the use of a spectral representation is more significant in wave-dominated shallow waters. In such environments, the effects of waves on currents can manifest with particular prominence, a factor that is less pronounced in intermediate water depths, as the locations of the measurements discussed in this study.

To provide a comprehensive context for our study and elucidate the rationale for our choice of modelling application, it is essential to place our research within the framework of its funding project. The DEMLIT project, funded by SHOM in collaboration with the University of Caen Normandy, is dedicated to investigate the sand filling dynamics in the Bay of Somme. The submitted manuscript represents the initial phase of this project, focusing on the macro-tidal

circulation off the bay and its interactions with offshore winds and waves. To do this we employed available tidal atlases and low-resolution bathymetric data from SHOM complemented by in-situ measurements from the University. It is important to note that we did not account for wave effects on currents below 2 meters water depth, as the interpolation of the low-res bathy data within the bay resulted in steep seabed gradients, leading to numerical instabilities in the surf zone.

This model will serve as a nest model, providing a foundation for higher-resolution, shallower-water nested applications. These forthcoming applications will explore hydrodynamics and sediment transport processes within the bay. Notably, we have collected new shallow-water, high-resolution bathymetric data and ADCP measurements in the surf zone to inform and validate this forthcoming phase of the modeling.

We understand the significance of accurately reproducing wave processes in shallow waters, especially while striving to improve the representation of wave effects on currents, and we acknowledge that previous versions of our model have been applied in such settings, as highlighted by Uchiyama et al. (2010) and Marchesiello et al. (2015). However, it is crucial to underscore the primary objective in our current study, which is centered on model the interactions of macro-tidal currents with offshore winds and waves. Given this clarification, we will remove from the section dealing with the assessment of modelled wave the last paragraph discussing wave breaking in shallow waters. These aspects, though undeniably important, will be reserved for the future extensions of our modelling efforts, as we focus on the fundamental objective of our study.

*4) Instead of a lengthy description of the field site, and given the chosen journal, we expect much more description on the coupling procedure: where there files modified in the wave or hydrodynamic models or can new versions of these models be pulled directly? Can the new coupling procedure be reproduced elsewhere easily? What about interpolation of the different fields and where is it handled?*

We appreciate the Reviewer's feedback and agree that a more detailed description of the coupling procedure is warranted.

All the additional spectral fields required for the proposed advanced coupling were already incorporated into the WAVEWATCH-III model, and we simply added the necessary exchanges in CROCO to compute the wave forcing terms. These modifications have been available in CROCO since the v1.2 release. Both the 'monochromatic' and 'full' coupling procedures are accessible for comparison in different configurations, and users can easily switch between them by activating or deactivating a preprocessing key.

The OASIS coupler handles all data exchanges, including interpolations on different grids. Coupling information is specified in a parameter file exclusively used by OASIS. Therefore, applying this new coupling to another configuration and assessing the impact of our developments should not pose significant challenges.

## More specific comments:

### ABSTRACT

1) *Lines 7-8: Given the presented results, and the comments above, I think that the “significant” currently needs to be toned down. Considering nearshore situation with adequate numerical experiments could surely better highlight the impact of using (full) spectral wave quantities.*

Following the Reviewer’s suggestion, we will carefully reconsider the wording in the abstract to accurately reflect the main outcomes of our study while taking into account its limitations in terms of nearshore modelling and the primary scope of our work.

2) *Lines 15-16: What about nearshore environments, where Bernoulli heads and breaking acceleration terms will be the dominant forcing of the nearshore circulation?*

In response to the Reviewer’s valuable feedback, we will carefully revise the text throughout the entire manuscript to eliminate any ambiguity regarding the study’s objective. We will explicitly narrow down the study objective from ‘modelling wave-current interactions in coastal areas’ to ‘modelling interactions of macro-tidal currents with winds and waves’. This adjustment will ensure greater clarity and alignment with the primary goals of our research.

### INTRODUCTION

3) *Line 21: “Wave-induced currents and setup” are not forcing terms.*

The text will be corrected.

4) *Line 26: Reformulate with “wave-dominated environments”?*

As we clarified in our response to the third major comment, the specific focus of our study does not revolve around ‘wave-dominated environments.’ We will take extensive measures to overhaul the entire introduction section, ensuring that the text provides a clear and accurate representation of the paper’s objective. This comprehensive revision will guide the reader toward a precise understanding of our research goals.

5) *Lines 34-35: “Three-dimensional modelling of the wave-induced flow was requested”. I think that the authors can find much better context and needs for resolving 3D currents in the nearshore context (e.g. the transport of sediment, particles or tracers).*

The sentence will be modified in accordance with the primary objective of our study. We appreciate the Reviewer’s suggestion, and it’s essential to note that even in intermediate waters within macro-tidal environments, the resolution of the vertical current profile is crucial for understand and model the transport of sediment, particles, and tracers. While the effects of winds and waves may be comparatively less pronounced, the accuracy of the vertical current profile remains instrumental in capturing these important aspects even in the discussed intermediate-water setting.

6) *Line 35: Specify what these theories are used for.*

The text will be update to specify that these theories derive depth-dependent expressions of the wave-averaged flux of momentum due to waves to study the interaction of currents and waves in water of finite depth.

7) Line 40: *“With simplifications”*. The end of this section feels too light, and considering the scope of the paper (the added-value of spectral estimates), more details should be provided with a more precise view on the state of the art regarding the modelling of wave-current interaction in 3D (cf. my general comment above).

We acknowledge the importance of providing a comprehensive overview of the state of the art of the modelling of wave-current interaction in 3D. In response to the Reviewer’s valuable suggestion, we will enhance the end of the introduction section to ensure a more thorough and detailed presentation of the current state of the field. By incorporating the references suggested by the Reviewer in his/her general comment, we will be able to enhance the comprehensiveness of our manuscript.

8) Line 46: *I do not think that “initiated” is correct, given that most of the work come from that of Uchiyama et al. (2009, 2010). The study by Marchesiello et al. (2015) brings no new development on the wave-current interaction part, and the authors do not even mention the CROCO modelling system.*

We agree with the Reviewer and will revise the sentence in question to better reflect the contributions of the cited works.

9) Line 52: *Again, what do the authors mean? This is literally the model developed in Uchiyama et al. (2010) and used in CROCO.*

See above point. This part of the introduction will be modified to better reflect the contributions of the cited works.

10) Lines 52-55: *If the model used in Marchesiello et al. (2015) is so accurate, why not using their configuration to test the added-value of the new developments in the context of the nearshore region?*

See the response to the third major point.

#### APPLICATION SITE AND DATA

11) *This section feels quite tedious to read, with too many and sometimes irrelevant details given the scope of the present study. I think that the authors need to reshape this section and keep the most relevant information only.*

We agree with the Reviewer that, despite well in line with the funding project of our research work, the description of the sedimentary environment in the Bay of Somme does not include relevant information for the scope of the present study. We will then remove from the section the paragraph describing sediment transport, seabed features and infilling sedimentary process characterising the bay.

12) Line 86: *“[...] a not fully developed wind sea. The energetic swell are generated*



*on limited fetches with a maximum length of 400 km". What do the authors mean? Swell developing over 400 km-long fetches?*

Yes, the Reviewer is right.

13) *Lines 102-107: a careful read is the minimum to provide before submission.*

Please, see our response to the general comment.

14) *Line 110: "2 meters above the bottom", so not over the whole water column as stated?*

The Reviewer is right. The text will be corrected.

## METHODS

15) *Description of WAVEWATCH-III: to my understanding, this model solves the evolution of directional wave spectra in the wavenumber space. Why is this equation different from that given in the model manual?*

The equation is identical to the one found in the WAVEWATCH-III manual, with the only distinction being that it is expressed in terms of wave energy and frequency, as opposed to wave action.

16) *Line 140-141: what wetting and drying means for spectral wave modelling.*

Wetting and drying in the spectral wave model operates in a manner consistent with the hydrodynamic model. It refrains from computation in grid cells where the instantaneous water depth falls below a specified threshold value.

17) *There seems to be a typo in  $Tm01$  in the manuscript, even the schematic of Fig. 2.*

The typo will be corrected throughout the text and in the schematic of Figure 2.

18) *Line 287: similar to earlier comment, what do the authors mean here? The wave setup or set-down are not forcing terms but result from the wave forces.*

The text will be corrected.

## NUMERICAL EXPERIMENTS

19) *Why using such a small scale model, which depend so strongly on wave and tidal forcing used at the boundaries? In particular, the tidal forcing is derived from a 2D hydrodynamic model, how does that affect the vertical shear observed at the instrument positions? The discussion of the results presented in the paper depends too heavily on this aspect for being ignored and not investigated.*

We agree with the Reviewer that our discussion of the results depends very much on the vertical shear observed at the instrument position to do not investigate the control exerted by the imposed tidal forcing on the results. As discussed in detail in the response to the second major comment, we conducted an additional numerical simulation with an extended computational domain, placing the measurement sites further from the boundaries where we imposed tidal

levels and currents. These supplementary results indicated the independence of our previous results from the relative distance between the forcing boundary and the measurement locations.

20) *Lines 310-311: Why such drastic choices? Can this model be reliably used in a nearshore context? Or is it suffering from instabilities? In any case, given this information, the authors simply cannot discuss shallow water processes like wave setup.*

We did not account for wave effects on currents below 2 meters water depth because the interpolation of the low-resolution bathymetric data resulted in steep seabed gradients within the bay, leading to numerical instabilities in the surf zone. We have recently collected accurate shallow-water high-resolution bathymetric data within the bay. In the forthcoming phases of our modelling of the Bay of Somme, we will use these new data and test the reliability of our model in the nearshore context.

21) *The impact of surface waves on the wind drag coefficient is not described. Have the authors investigated this? How did they make sure that their tests are all consistent with this regard?*

We appreciate the Reviewer's consideration of the potential impact of the model domain's scale on the representation of wind contributions. While it is true that the wind contribution near the boundary may be subject to some uncertainty due to the reduced extension of the model domain, we would like to emphasise that the identified tendency observed in our results remains valid. The key point is that the identified tendency, specifically the acceleration of the current profile when accounting for additional spectral wave field exchanges, is not contingent on the specific uncertainties related to wind contributions. Even though some uncertainty may exist due to the scale of the model domain and its influence on the reproduction of a realistic 3D profile, the observed tendency is consistent and supported by the data.

## RESULTS AND DISCUSSIONS

22) *Line 331: why is "fresh" relevant here? I might be missing some specific term here.*

Here we are referring to the Beaufort wind scale, where fresh to strong breeze are classified depending on the wind speed.

23) *Lines 333: Why switching to Hrms, is that for reducing the errors of the model? Though the authors consider their model "validated" (line 337), at the peak of the event they consider, half the wave energy is missing in the model. In my opinion, this is far from being satisfactory, given that the authors then discuss added-value of the order of 1 cm/s in terms of currents, without proper sensitivity analysis of other relevant parameters (wind drag coefficient, mixing length, amount of TKE injected in the water column and so on).*

We used both significant wave height and its root-mean-square value throughout the manuscript due to the fact that the wave model provides results in terms of significant wave height, while the hydrodynamic model gives root-mean-square values. We acknowledge the Reviewer's concern regarding the discrepancy in wave energy representation during the peak of the discussed event.

It is important to note that this limitation does not arise from the specific model developments presented in our study but is associated with the spectral wave model used to provide boundary conditions with full spectra, a computationally demanding yet best practice in wave modelling. Furthermore, it's worth emphasizing that the representation of tidal currents is much more accurate than that of waves in our model. The primary focus of our study is to assess the added value of the spectral terms introduced in the representation of wind and wave effects on macro-tidal currents, which can still be meaningfully discussed with the current model configuration. We observe that the predicted current values, when considering these additional terms, tend to be closer to the measurements, resulting in differences of approximately 10% of the current magnitude (2-3 cm/s in 20-30 cm/s currents, see bottom left panel of Figure 13). Nonetheless, we agree with the Reviewer that addressing the issue of wave energy representation in future modeling efforts is important. We appreciate the Reviewer's feedback, which will guide our ongoing work to further enhance the accuracy and reliability of our model, especially regarding wave-current interactions

24) *Line 343: What is a wavenumber velocity?*

This part of the text will be removed.

25) *Line 358: this statement is not supported by the material presented in the manuscript.*

This part of the text will be removed.

26) *Line 360-363: To me, it simply shows how dependent the local model is to the forcing, and that there is a systematic low bias at every high tide (half a meter). Then, the authors provide some explanation to the observed phase shift, while it clearly comes from the forcing. How does the original hydrodynamic model compare with the data?*

Please see the response to the second major point.

27) *Line 382-383: Not really true since a better match is systematically obtained with the previous configuration during ebbs.*

True, but a better match is systematically obtained with the coupled wind-wave-current configuration during the remaining phases of the tidal cycle, resulting in the same R2 and RMSE values on which this sentence is based.

28) *Line 390: "[...] due to the presence of sub-grid scale bedforms". Again not supported. Please check the forcing.*

The sentence will be modified without referring to the presence of sub-grid scale bedforms. Regarding the forcing, as discussed in our response to the second major point, we checked the forcing and we assessed that it does not overly control the obtained results.

## ASSESSMENT OF VERTICAL CURRENT PROFILES FOR CONTRASTING EVENTS

29) *Line 408: How is wind drag coefficient computed, and how did the authors make sure all simulations are consistent with this regard? i.e. is the wind contribution similar when waves are accounted for?*

The wind drag coefficient is computed according to the formulation of Smith (1988), which estimates the coefficients for sea surface wind stress as a function of wind speed while accounting for a constant Charnock coefficient. In the present study, the latter is computed assuming fetch-limited conditions. In the discussion of the results, our aim was to methodically isolate the distinct contributions stemming from various forcing factors. To achieve this, we conducted a series of simulations in which we incrementally introduced different metocean forcings while ensuring that their effects remained as isolated as possible. As part of this approach, we deliberately did not consider the influence of waves on winds through adjustments to the Charnock coefficient. In other words, we kept the wind contribution consistent, irrespective of whether waves were factored into the model. This deliberate choice allowed us to scrutinise and quantify the impact of other variables while minimising the confounding effects of altered wind conditions due to wave effects and viceversa.

30) *Lines 413-414: What about the impact of the mixing length and its parameterisation (end of Section 3.3.5) on the current magnitude at the top of the water column?*

We did not perform sensitivity tests on the impact of the mixing length parameterisation employed. In Section 3.3.5 we introduced the turbulence model to highlight the difference in its choice with respect to former versions of ROMS, which include some of the additional spectral wave terms discussed in our study while using a different turbulence model.

31) *Line 433: I rather see a 1 and 3 cm/s increase depending on the configuration.*

The Reviewer is right. We will modified the text accordingly.

32) *Line 435: “[...] improves the accuracy of the results”. Given the results, this is all relative, i.e. whether taken at the surface or bottom. What are the rmsd for depth-averaged values and how do they compare?*

The results using the new spectral field exchange show an improved matching with the measurements both close to the free-surface and the bottom. Also, since the entire paper is focused on the 3D modelling of wave-current interactions, we do not see the point in computing stats associate to depth-averaged values.

33) *Line 437: Why jumping over 3 Figures? Also, this specific graph shows velocities (m/s) and heights (m) over the same axis, a different one should be used.*

The figure will be modified according to the Reviewer’s comment.

34) *Line 447: Given that the boundary remains close to the measurements location, too much uncertainty exists on whether or not the model develops a realistic 3D profile (i.e. taking into account the response to winds etc). In this context, the statement is speculative and should be investigated further.*

We removed te speculative sentence from the text.

35) *Line 443-444: What do the authors mean here? Please develop.*

Probably there is a typo in the line numbers. At these lines, we just observed how wind aligned

with tidal propagation accelerates further the free-surface velocity.

36) *Line 451-452: So why choosing this limited experimental data set or focusing on the upper section of the water column?*

To understand why we focus on this particular data set, please see the response to the third major point. It's crucial to emphasise that the primary focus of our paper is to evaluate the added-value of incorporating additional spectral wave terms in the computation of wave-current interactions, rather than concentrating on the details of turbulence modelling in these interactions. We employed a standard turbulence model with standard boundary conditions to ensure a fair and consistent comparison between simulations with and without the spectral terms.

37) *Line 465: Not supported. Using more carefully designed numerical experiments, including synthetic cases would be extremely useful here.*

The sentence will be removed from the text.

38) *Line 472-473: Here, I think it is misleading to compare the wave breaking terms for bulk and full spectral quantities. The bulk representation has so far only been derived and used for the case of depth-induced wave breaking (Uchiyama et al., 2010; Kumar et al., 2012) and not for whitecapping, which is the dominant dissipative process for waves in the present case. Whitecapping affects mostly high-frequency components, so the comparison is not relevant in my opinion. This made me realise that the authors did not describe the full spectral representation of the wave forces (not that of dissipation).*

We agree with the Reviewer that directly comparing these terms may not be suitable, given that the bulk representation has primarily been applied in the context of depth-induced wave breaking rather than whitecapping, which is the dominant dissipative process for waves in our study area. However, we would like to clarify that our intention was not to compare bulk and full spectral representations of wave breaking. Instead, our objective was to assess the improvement resulting from our model developments, which include the representation of whitecapping dissipation in addition to depth-induced breaking. Since no depth-induced breaking occurs in the measuring location where the data discussed in this study have been collected, the observed changes in the solution are primarily due to the consideration of whitecapping effects. To make this point clearer, we will revise the corresponding text to better express the purpose of this comparison.

39) *Line 490: This is all relative, we speak of 0.5 cm/s differences while wave model performances are poor and RMSE for currents is 10 cm/s, with much larger errors locally.*

Please consider that the disparities in current magnitude are, in certain instances, greater than 3 cm/s. Also, when addressing variations slightly below 1 cm/s in a Stokes drift that fluctuates between 10 and 5 cm/s, this accounts for approximately 10% of the overall value.

40) *Fig. 17: Please clarify the representation of water levels as it is not clear. Also, in some Figures, the vertical datum for depth is not clear.*

Figure 17 will be changed to clarify the representation of water levels.

41) *Line 497: Is that so? Unless there are inconsistencies in ROMS/CROCO, the peak wavenumber used in the monochromatic formulation should be Doppler-shifted too in full-coupled configurations.*

The Reviewer is right, and we will remove the sentence from the manuscript. Initially, this section aimed to elucidate the distinctions between one-way and two-way coupled simulation outcomes. However, we later decided to exclude the one-way simulations from the paper to enhance conciseness.

42) *Line 505: Please be consistent. In some sections of the manuscript, refraction processes are well represented and in this one, they are likely misrepresented. In both cases, the analysis is poorly supported by results.*

Since we will removed from the text the parts dealing with wave processes in shallo waters, the depth-induced refraction process will be described only as likely misrepresented. We will deal with this issue using higher resolution nested models in shallow waters in our future modelling works.

43) *Line 506: So why not increasing the spatial resolution of the model? And why analysing processes such as depth-induced refraction and breaking?*

Please see the response to the third major comment.

44) *Line 515-520: How is the surf zone identified here? Does that include region where whitecapping occurs? Like many sections and physical interpretations of results, this discussion is poorly supported.*

We will modified the text replacing the use of the term 'surf zone' to avoid any confusion.

45) *Line 544-545: I struggle to understand and believe the key message here.*

The observed slight phase shift in tidal floods between modelled and measured currents does not depend on random metocean forcing. As it is not related with wind and wave forcing, it does not impede our ability to assess the effects of wind and wave forcing on macro-tidal currents, which is the primary focus of our study. Thus, this phase shift is not a hindrance to the evaluation of our model developments related to wave and wind influences on currents.

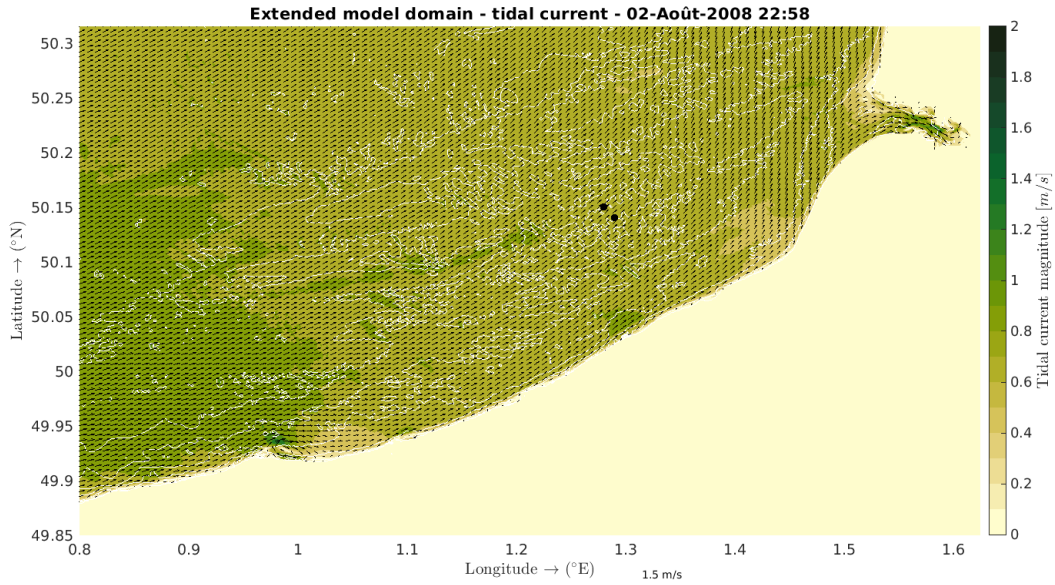

Figure 1: **New model results in the extended computational domain.** Depth-averaged current magnitudes (coloured shading) with superimposed current vectors (black arrows) computed from the new simulation across its whole domain at the peak of the flood tidal flow the 2 August 2008 at 11 pm. White lines are bathymetric contours while black circles are the extracting (ADCP and AQDP) locations.

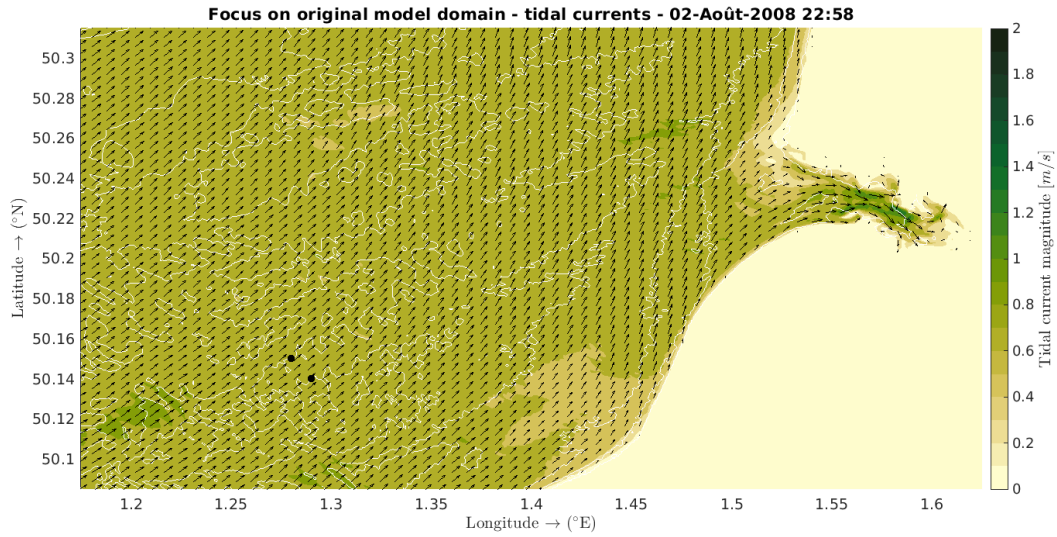

Figure 2: **New model results in the previous computational domain.** Depth-averaged current magnitudes (coloured shading) with superimposed current vectors (black arrows) computed from the new simulation across the old domain at the peak of the flood tidal flow the 2 August 2008 at 11 pm. White lines are bathymetric contours while black circles are the extracting (ADCP and AQDP) locations.



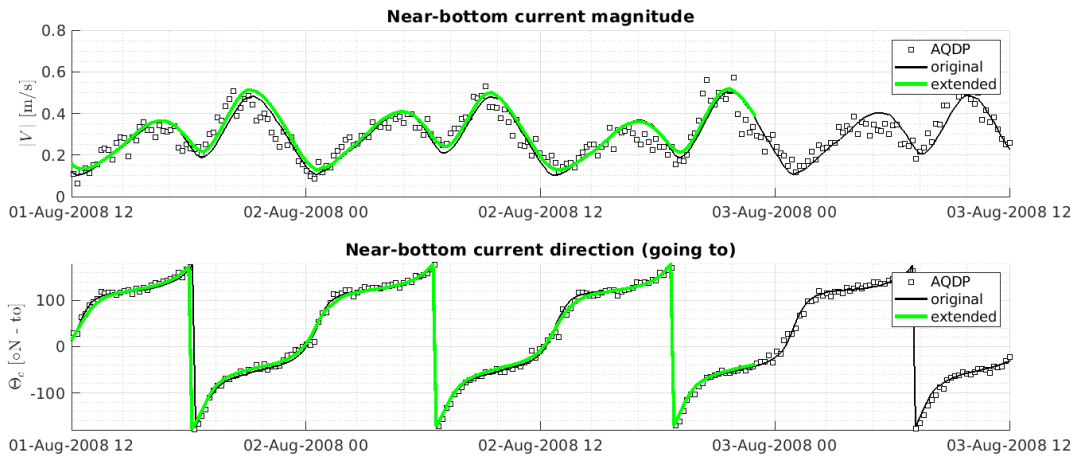

Figure 3: **Time series of newly computed tidal currents versus AQDP data.** Model results (lines) are compared with AQDP (dots) measurements in terms of (top) current magnitude and (bottom) 'going to' direction at 1 m above bottom (mab).

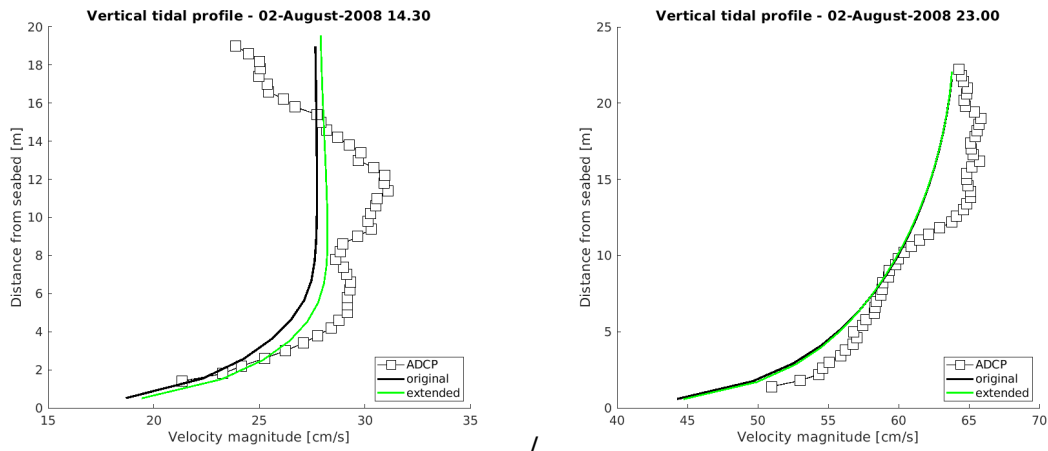

**Figure 4: Vertical profiles of newly computed tidal currents versus ADCP data.** Measured (squares) and modelled (continuous lines) vertical profiles of the current on 2 August 2008 at 2.30 pm during tidal reversal (left panel). Measured (squares) and modelled (continuous lines) vertical profiles of the current on 2 August 2008 at 11.00 pm during tidal ebb (right panel).
